# Supplementary material for: The oxygen reactivity of an artificial hydrogenase designed in a reengineered copper storage protein
Source: Royal Society of Chemistry journal article supplement (doi:10.1039/c9dt04913d), 2020-01-01
Supplement: c9dt04913d1.pdf [file c9dt04913d1.pdf]

## Supporting Information

### **The Oxygen Reactivity of an Artificial Hydrogenase Designed in a Reengineered Copper Storage Protein**

Dhanashree Selvan,<sup>a</sup> Yelu Shi,<sup>b</sup> Pallavi Prasad,<sup>a</sup> Skyler Crane,<sup>a</sup> Yong Zhang,<sup>b\*</sup> Saumen Chakraborty<sup>a\*</sup>

<sup>a</sup>*Department of Chemistry and Biochemistry, University of Mississippi, University, MS 38677, USA*

<sup>b</sup>*Department of Chemistry and Chemical Biology, Stevens Institute of Technology, 1 Castle Point on Hudson, NJ 07030, USA*

**Table S1.** Key geometric parameters.

|             | R <sub>Ni-S1</sub> | R <sub>Ni-S2</sub> | R <sub>Ni-S3</sub> | R <sub>Ni-S4</sub> | R <sub>Ni-O1</sub> | R <sub>O1-O2</sub> | R <sub>O2-S4</sub> | ∠S1-S2-S3-S4 |
|-------------|--------------------|--------------------|--------------------|--------------------|--------------------|--------------------|--------------------|--------------|
|             | Å                  | Å                  | Å                  | Å                  | Å                  | Å                  | Å                  | degree       |
| <b>I-1</b>  | 2.459              | 2.350              | 2.447              | 2.362              |                    |                    |                    | 48.0         |
| <b>I-2</b>  | 2.400              | 2.330              | 2.459              | 2.322              |                    |                    |                    | 48.2         |
| <b>I-2'</b> | 2.458              | 2.331              | 2.525              | 3.969              | 1.884              | 1.459              | 1.617              | 55.4         |
| <b>I-3</b>  | 2.473              | 2.419              | 2.457              | 2.437              | 2.144              | 1.444              | /                  | 27.5         |
| <b>I-3'</b> | 2.412              | 2.377              | 2.405              | 2.374              | 2.157              | 1.451              | /                  | 24.4         |
| <b>I-4</b>  | 2.476              | 2.318              | 2.508              | 2.260              | 1.815              | /                  | /                  | 48.7         |

**Table S2.** Key spin densities and relative reaction Gibbs free energies from I-1

|             | ρ <sup>αβ</sup> <sub>Ni</sub> | ρ <sup>αβ</sup> <sub>S1</sub> | ρ <sup>αβ</sup> <sub>S2</sub> | ρ <sup>αβ</sup> <sub>S3</sub> | ρ <sup>αβ</sup> <sub>S4</sub> | ρ <sup>αβ</sup> <sub>O1</sub> | ρ <sup>αβ</sup> <sub>O2</sub> | ΔG       |
|-------------|-------------------------------|-------------------------------|-------------------------------|-------------------------------|-------------------------------|-------------------------------|-------------------------------|----------|
|             | e                             | e                             | e                             | e                             | e                             | e                             | e                             | kcal/mol |
| <b>I-1</b>  | 1.484                         | 0.111                         | 0.156                         | 0.116                         | 0.130                         | 0.169                         | 0.009                         | 0.00     |
| <b>I-2</b>  | 0.851                         | 0.047                         | 0.036                         | 0.036                         | 0.041                         |                               |                               | -176.36  |
| <b>I-2'</b> | 1.516                         | 0.120                         | 0.131                         | 0.068                         | 0.004                         | 0.150                         | 0.001                         | 54.21    |
| <b>I-3</b>  | 1.527                         | 0.110                         | 0.123                         | 0.081                         | 0.111                         | 0.035                         | 0.002                         | -282.17  |
| <b>I-3'</b> | 1.311                         | -                             | -                             | -                             | -                             | 0.041                         | 0.002                         | 177.58   |
|             |                               | 0.061                         | 0.112                         | 0.121                         | 0.046                         |                               |                               |          |
| <b>I-4</b>  | 0.867                         | 0.039                         | -                             | 0.076                         | -                             | 0.152                         | 0.867                         | -354.95  |
|             |                               |                               | 0.074                         |                               | 0.052                         |                               |                               |          |

**Table S3.** Key geometric parameters in I-1 models

|                     | R <sub>Ni-S1</sub> | R <sub>Ni-S2</sub> | R <sub>Ni-S3</sub> | R <sub>Ni-S4</sub> | ∠S1-S2-S3-S4 |
|---------------------|--------------------|--------------------|--------------------|--------------------|--------------|
|                     | Å                  | Å                  | Å                  | Å                  | Degree       |
| <sup>1</sup> I-1-SP | 2.301              | 2.275              | 2.313              | 2.279              | 32.0         |
| <sup>1</sup> I-1-TH | 2.314              | 2.274              | 2.339              | 2.246              | 54.4         |
| <sup>3</sup> I-1-SP | 2.459              | 2.350              | 2.447              | 2.362              | 48.0         |
| <sup>3</sup> I-1-TH | 2.459              | 2.358              | 2.432              | 2.380              | 62.8         |

**Table S4.** Key spin densities and relative energies in I-1 models

|                     | ρ <sup>αβ</sup> <sub>Ni</sub> | ρ <sup>αβ</sup> <sub>S1</sub> | ρ <sup>αβ</sup> <sub>S2</sub> | ρ <sup>αβ</sup> <sub>S3</sub> | ρ <sup>αβ</sup> <sub>S4</sub> | ΔE       | ΔE <sub>ZPE</sub> | ΔH       | ΔG       |
|---------------------|-------------------------------|-------------------------------|-------------------------------|-------------------------------|-------------------------------|----------|-------------------|----------|----------|
|                     | e                             | e                             | e                             | e                             | e                             | kcal/mol | kcal/mol          | kcal/mol | kcal/mol |
| <sup>1</sup> I-1-SP | 0.000                         | 0.000                         | 0.000                         | 0.000                         | 0.000                         | 6.40     | 6.39              | 6.46     | 7.07     |
| <sup>1</sup> I-1-TH | 0.000                         | 0.000                         | 0.000                         | 0.000                         | 0.000                         | 57.62    | 57.68             | 56.96    | 61.14    |
| <sup>3</sup> I-1-SP | 1.484                         | 0.111                         | 0.156                         | 0.116                         | 0.130                         | 0.00     | 0.00              | 0.00     | 0.00     |
| <sup>3</sup> I-1-TH | 1.494                         | 0.073                         | 0.151                         | 0.095                         | 0.170                         | 66.81    | 66.70             | 66.27    | 68.73    |

**Table S5.** Key geometric parameters in I-2' models

|            | R <sub>Ni-S1</sub> | R <sub>Ni-S2</sub> | R <sub>Ni-S3</sub> | R <sub>Ni-S4</sub> | R <sub>Ni-O1</sub> | R <sub>O1-O2</sub> | R <sub>O2-S3/4</sub> | ∠S1-S2-S3-S4 |
|------------|--------------------|--------------------|--------------------|--------------------|--------------------|--------------------|----------------------|--------------|
|            | Å                  | Å                  | Å                  | Å                  | Å                  | Å                  | Å                    | degree       |
| I-2'-F-up  | 2.404              | 2.407              | 4.163              | 2.422              | 1.888              | 1.475              | 1.631                | 50.1         |
| I-2'-AF-up | 2.803              | 2.421              | 2.954              | 2.265              | 1.775              | 1.511              | 1.720                | 62.3         |
| I-2'-F-dn  | 2.458              | 2.331              | 2.525              | 3.969              | 1.884              | 1.459              | 1.617                | 55.4         |
| I-2'-AF-dn | 2.373              | 2.270              | 2.410              | 4.135              | 1.874              | 1.465              | 1.617                | 47.3         |

**Table S6.** Key spin densities and relative energies in I-2' models

|            | $\rho^{\alpha\beta}_{\text{Ni}}$<br>e | $\rho^{\alpha\beta}_{\text{S1}}$<br>e | $\rho^{\alpha\beta}_{\text{S2}}$<br>e | $\rho^{\alpha\beta}_{\text{S3}}$<br>e | $\rho^{\alpha\beta}_{\text{S4}}$<br>e | $\rho^{\alpha\beta}_{\text{O1}}$<br>e | $\rho^{\alpha\beta}_{\text{O2}}$<br>e | $\Delta E$<br>kcal/mol | $\Delta E_{\text{ZPE}}$<br>kcal/mol | $\Delta H$<br>kcal/mol | $\Delta G$<br>kcal/mol |
|------------|---------------------------------------|---------------------------------------|---------------------------------------|---------------------------------------|---------------------------------------|---------------------------------------|---------------------------------------|------------------------|-------------------------------------|------------------------|------------------------|
| I-2'-F-up  | 1.589                                 | 0.052                                 | 0.076                                 | 0.000                                 | 0.101                                 | 0.169                                 | 0.009                                 | 15.06                  | 13.37                               | 14.03                  | 11.27                  |
| I-2'-AF-up | 0.160                                 | -0.177                                | 0.046                                 | 0.002                                 | -0.042                                | 0.001                                 | -0.014                                | 93.11                  | 87.00                               | 87.01                  | 84.56                  |
| I-2'-F-dn  | 1.516                                 | 0.120                                 | 0.131                                 | 0.068                                 | 0.004                                 | 0.150                                 | 0.001                                 | 0.00                   | 0.00                                | 0.00                   | 0.00                   |
| I-2'-AF-dn | 0.024                                 | -0.071                                | 0.036                                 | -0.020                                | -0.002                                | 0.031                                 | 0.002                                 | 3.75                   | 4.01                                | 3.51                   | 5.61                   |

**Table S7.** Key geometric parameters in I-3' models

|              | $R_{\text{Ni-S1}}$<br>Å | $R_{\text{Ni-S2}}$<br>Å | $R_{\text{Ni-S3}}$<br>Å | $R_{\text{Ni-S4}}$<br>Å | $R_{\text{Ni-O1}}$<br>Å | $R_{\text{O1-O2}}$<br>Å | $R_{\text{O2-S3/4}}$<br>Å | $\angle \text{S1-S2-S3-S4}$<br>degree |
|--------------|-------------------------|-------------------------|-------------------------|-------------------------|-------------------------|-------------------------|---------------------------|---------------------------------------|
| I-3'-Ni-4S-1 | 2.412                   | 2.377                   | 2.405                   | 2.374                   | 2.157                   | 1.451                   | /                         | 24.4                                  |
| I-3'-Ni-4S-2 | 2.401                   | 2.418                   | 2.503                   | 2.478                   | 2.138                   | 1.445                   | /                         | 48.1                                  |

**Table S8.** Key spin densities and relative energies in I-3' models

|              | $\rho^{\alpha\beta}_{\text{Ni}}$<br>e | $\rho^{\alpha\beta}_{\text{S1}}$<br>e | $\rho^{\alpha\beta}_{\text{S2}}$<br>e | $\rho^{\alpha\beta}_{\text{S3}}$<br>e | $\rho^{\alpha\beta}_{\text{S4}}$<br>e | $\rho^{\alpha\beta}_{\text{O1}}$<br>e | $\rho^{\alpha\beta}_{\text{O2}}$<br>e | $\Delta E$<br>kcal/mol | $\Delta E_{\text{ZPE}}$<br>kcal/mol | $\Delta H$<br>kcal/mol | $\Delta G$<br>kcal/mol |
|--------------|---------------------------------------|---------------------------------------|---------------------------------------|---------------------------------------|---------------------------------------|---------------------------------------|---------------------------------------|------------------------|-------------------------------------|------------------------|------------------------|
| I-3'-Ni-4S-1 | 1.311                                 | -0.061                                | -0.112                                | -0.121                                | -0.046                                | 0.041                                 | 0.002                                 | 0.00                   | 0.00                                | 0.00                   | 0.00                   |
| I-3'-Ni-4S-2 | 1.308                                 | -0.091                                | 0.124                                 | -0.169                                | -0.173                                | 0.019                                 | -0.002                                | -3.43                  | -2.24                               | -2.79                  | 0.03                   |

**Table S9.** Key geometric parameters in I-3 models

|                          | $R_{\text{Ni-S1}}$<br>Å | $R_{\text{Ni-S2}}$<br>Å | $R_{\text{Ni-S3}}$<br>Å | $R_{\text{Ni-S4}}$<br>Å | $R_{\text{Ni-O1}}$<br>Å | $R_{\text{O1-O2}}$<br>Å | $\angle \text{S1-S2-S3-S4}$<br>degree |
|--------------------------|-------------------------|-------------------------|-------------------------|-------------------------|-------------------------|-------------------------|---------------------------------------|
| <sup>1</sup> I-3-Ni-4S-1 | 2.304                   | 2.275                   | 2.302                   | 2.264                   | 3.166                   | 1.446                   | 29.6                                  |
| <sup>3</sup> I-3-Ni-4S-1 | 2.473                   | 2.419                   | 2.457                   | 2.437                   | 2.144                   | 1.444                   | 27.5                                  |
| <sup>1</sup> I-3-Ni-4S-2 | 2.303                   | 2.293                   | 2.316                   | 2.270                   | 2.674                   | 1.448                   | 31.9                                  |
| <sup>3</sup> I-3-Ni-4S-2 | 2.461                   | 2.383                   | 2.470                   | 2.414                   | 2.194                   | 1.438                   | 52.9                                  |

**Table S10.** Key spin densities and relative energies in I-3 models

|                          | $\rho^{\alpha\beta}_{\text{Ni}}$<br>e | $\rho^{\alpha\beta}_{\text{S1}}$<br>e | $\rho^{\alpha\beta}_{\text{S2}}$<br>e | $\rho^{\alpha\beta}_{\text{S3}}$<br>e | $\rho^{\alpha\beta}_{\text{S4}}$<br>e | $\rho^{\alpha\beta}_{\text{O1}}$<br>e | $\rho^{\alpha\beta}_{\text{O2}}$<br>e | $\Delta E$<br>kcal/mol | $\Delta E_{\text{ZPE}}$<br>kcal/mol | $\Delta H$<br>kcal/mol | $\Delta G$<br>kcal/mol |
|--------------------------|---------------------------------------|---------------------------------------|---------------------------------------|---------------------------------------|---------------------------------------|---------------------------------------|---------------------------------------|------------------------|-------------------------------------|------------------------|------------------------|
| <sup>1</sup> I-3-Ni-4S-1 | 0.000                                 | 0.000                                 | 0.000                                 | 0.000                                 | 0.000                                 | 0.000                                 | 0.000                                 | 9.01                   | 8.30                                | 9.39                   | 6.26                   |
| <sup>3</sup> I-3-Ni-4S-1 | 1.527                                 | 0.110                                 | 0.123                                 | 0.081                                 | 0.111                                 | 0.035                                 | 0.002                                 | 7.52                   | 5.18                                | 6.82                   | 0.13                   |
| <sup>1</sup> I-3-Ni-4S-2 | 0.000                                 | 0.000                                 | 0.000                                 | 0.000                                 | 0.000                                 | 0.000                                 | 0.000                                 | 15.94                  | 15.60                               | 16.51                  | 13.49                  |
| <sup>3</sup> I-3-Ni-4S-2 | 1.506                                 | 0.112                                 | 0.141                                 | 0.091                                 | 0.113                                 | 0.029                                 | 0.000                                 | 0.00                   | 0.00                                | 0.0                    | 0.00                   |

**Table S11.** Key geometry parameters in I-4 models

|             | $R_{\text{Ni-S1}}$<br>Å | $R_{\text{Ni-S2}}$<br>Å | $R_{\text{Ni-S3}}$<br>Å | $R_{\text{Ni-S4}}$<br>Å | $R_{\text{Ni-O1}}$<br>Å | $R_{\text{S4-O1}}$<br>Å | $\angle \text{S1-S2-S3-S4}$<br>degree |
|-------------|-------------------------|-------------------------|-------------------------|-------------------------|-------------------------|-------------------------|---------------------------------------|
| I-4-Ni-4S-1 | 2.476                   | 2.318                   | 2.508                   | 2.260                   | 1.815                   | /                       | 48.7                                  |
| I-4-Ni-4S-2 | 2.382                   | 2.316                   | 2.434                   | 2.465                   | 1.772                   | /                       | 55.6                                  |

**Table S12.** Key spin densities and relative energies in **I-4** models

|             | $\rho^{\alpha\beta}_{\text{Ni}}$<br>e | $\rho^{\alpha\beta}_{\text{S1}}$<br>e | $\rho^{\alpha\beta}_{\text{S2}}$<br>e | $\rho^{\alpha\beta}_{\text{S3}}$<br>e | $\rho^{\alpha\beta}_{\text{S4}}$<br>e | $\rho^{\alpha\beta}_{\text{O1}}$<br>e | $\Delta E$<br>kcal/mol | $\Delta E_{\text{ZPE}}$<br>kcal/mol | $\Delta H$<br>kcal/mol | $\Delta G$<br>kcal/mol |
|-------------|---------------------------------------|---------------------------------------|---------------------------------------|---------------------------------------|---------------------------------------|---------------------------------------|------------------------|-------------------------------------|------------------------|------------------------|
| I-4-Ni-4S-1 | 0.867                                 | 0.039                                 | -0.074                                | 0.076                                 | -0.052                                | 0.152                                 | 0.00                   | 0.00                                | 0.00                   | 0.00                   |
| I-4-Ni-4S-2 | 0.775                                 | 0.025                                 | -0.033                                | -0.027                                | 0.254                                 | 0.016                                 | 2.65                   | 2.72                                | 2.61                   | 2.84                   |

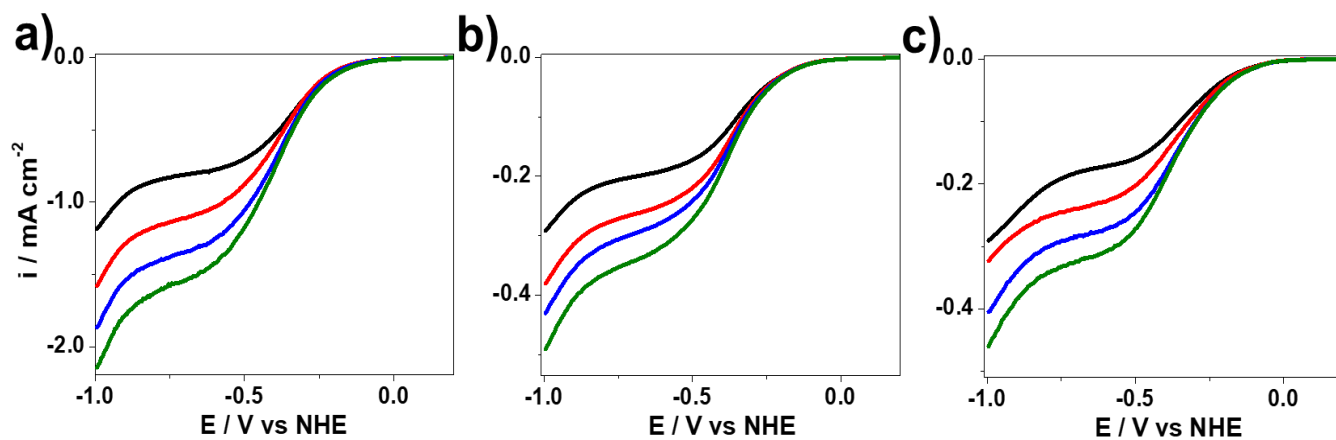

**Figure S1:** The linear sweep voltammograms (LSVs) of Ni(II)-NBP at different rotation rates, 125 rpm (black), 250 rpm (red), 375 rpm (blue) and 500 rpm (olive) under oxic conditions at (a) pH 6, (b) pH 7, and (c) pH 9.

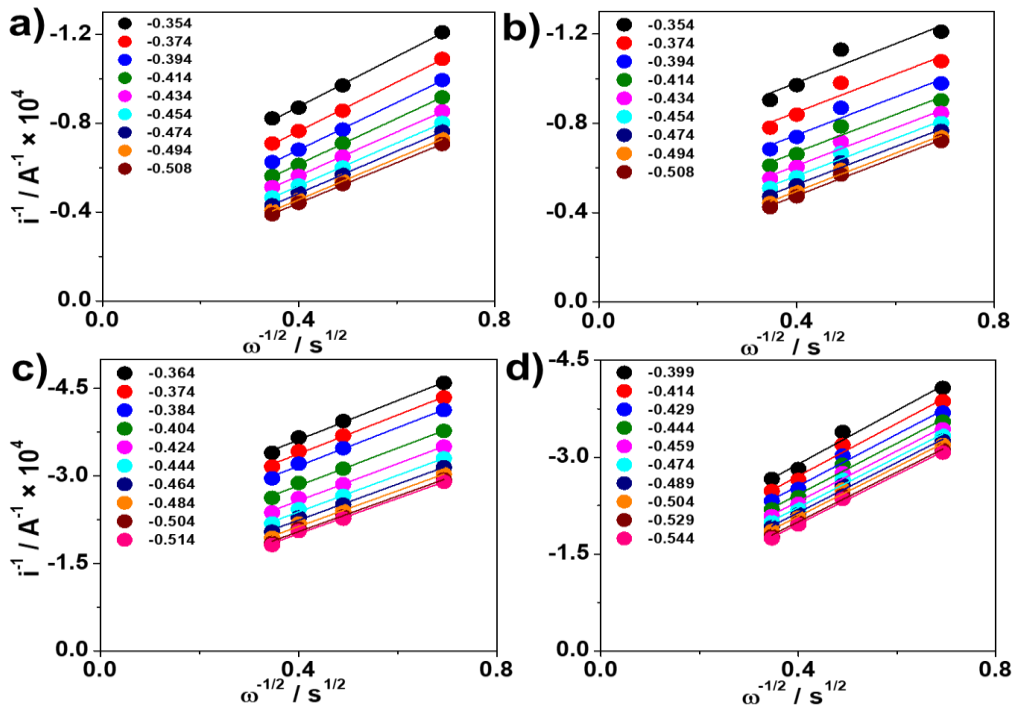

**Figure S2:** The Koutecký-Levich (K-L) Analyses of the LSVs of Ni(II)-NBP at different rotation rates under ambient  $O_2$  at varying pH (a) pH 5 (b) pH 6 (c) pH 7 and (d) pH 9. The corresponding potential values are shown on each plot.

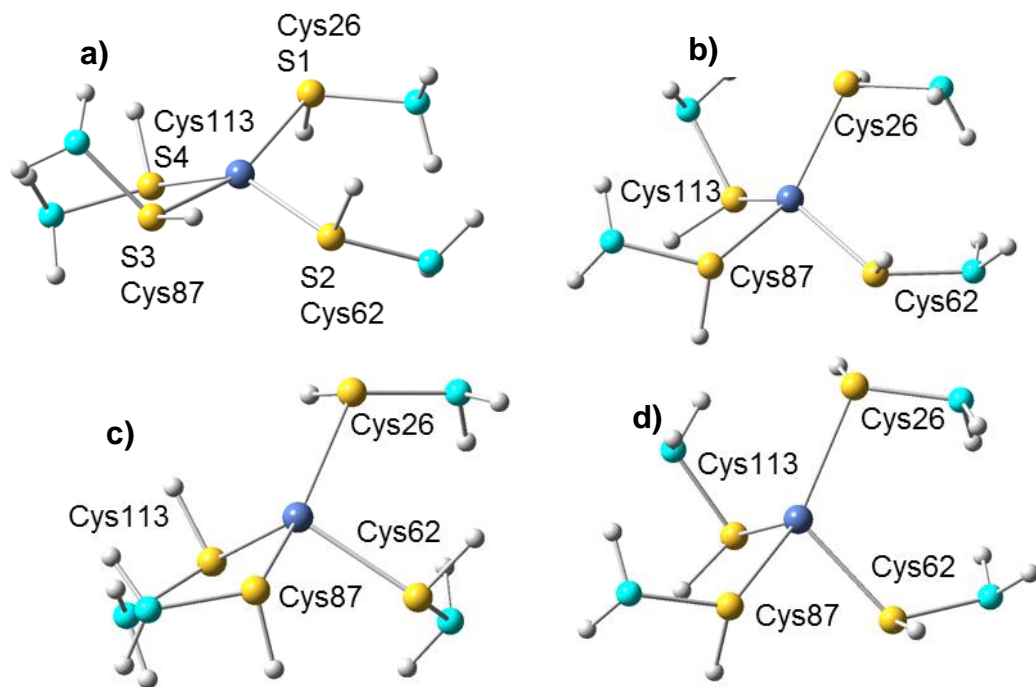

**Figure S3.** QM region of optimized I-1: a)  $^1\text{I-1-SP}$ ; b)  $^1\text{I-1-TH}$ ; c)  $^3\text{I-1-SP}$ ; d)  $^3\text{I-1-TH}$ .

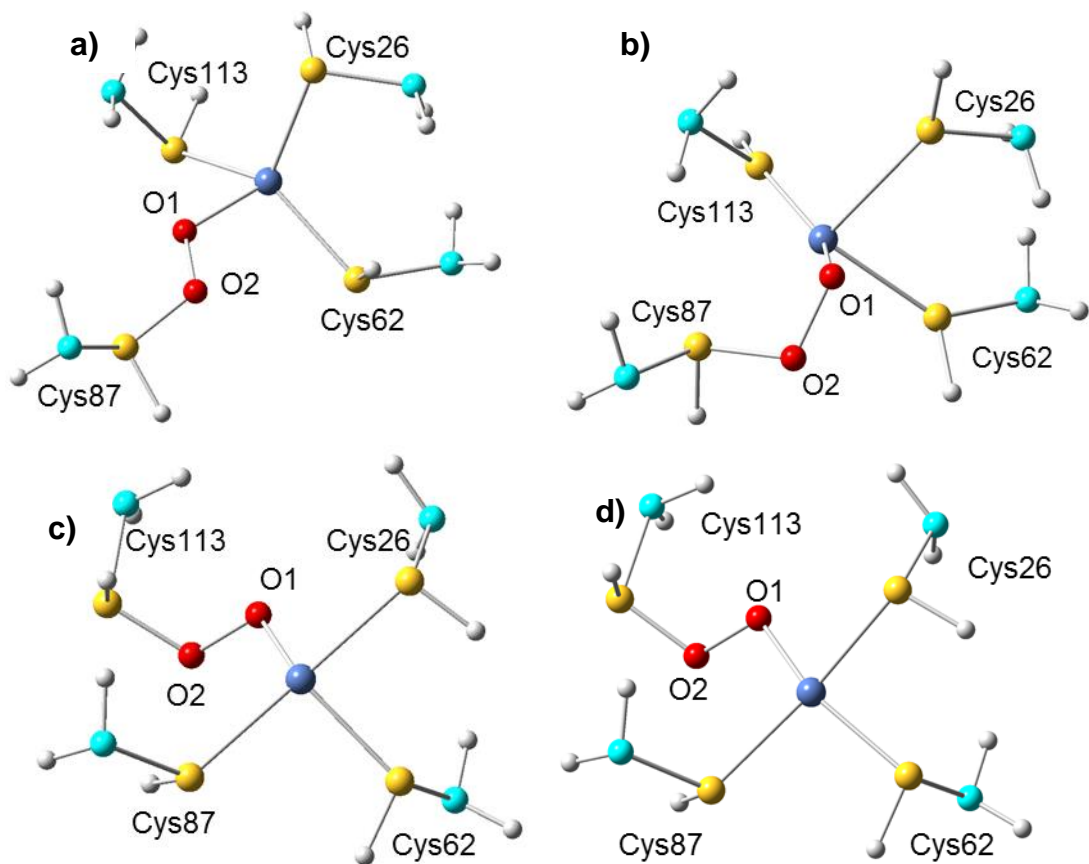

**Figure S4.** QM region of optimized I-2' models: **a)** I-2'-F-up; **b)** I-2'-AF-up; **c)** I-2'-F-dn; **d)** I-2'-AF-dn. Atom color scheme: Ni- blue gray, S- yellow, O- red, C- cyan, H- grey.



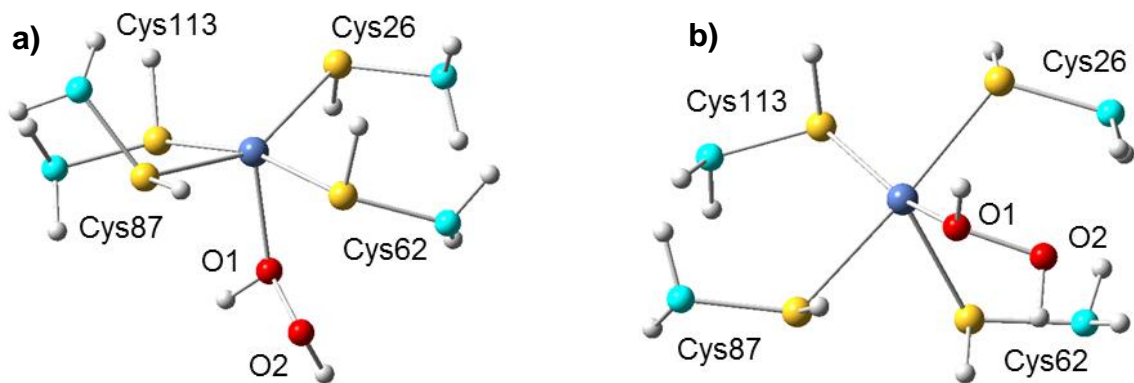

**Figure S5.** QM region of optimized I-3': **a)** I-3'-Ni-4S-1; **b)** I-3'-Ni-4S-2.

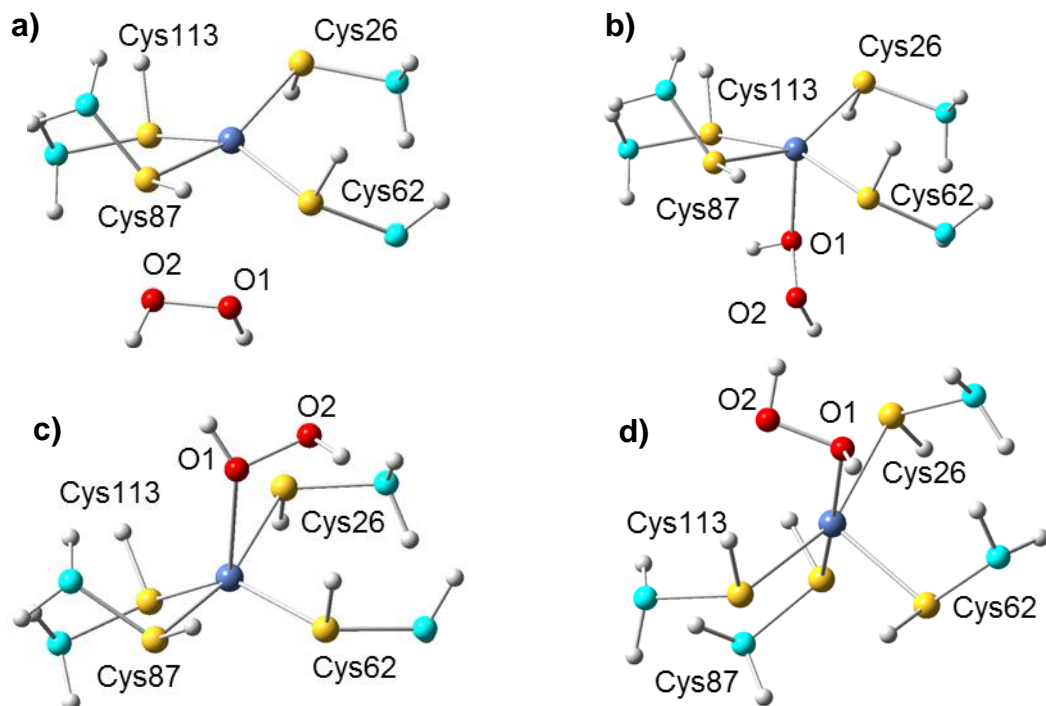

**Figure S6.** QM region of optimized I-3: a)  $^1\text{I-3-Ni-4S-1}$ ; b)  $^3\text{I-3-Ni-4S-1}$ ; c)  $^1\text{I-3-Ni-4S-2}$ ; d)  $^3\text{I-3-Ni-4S-2}$ .

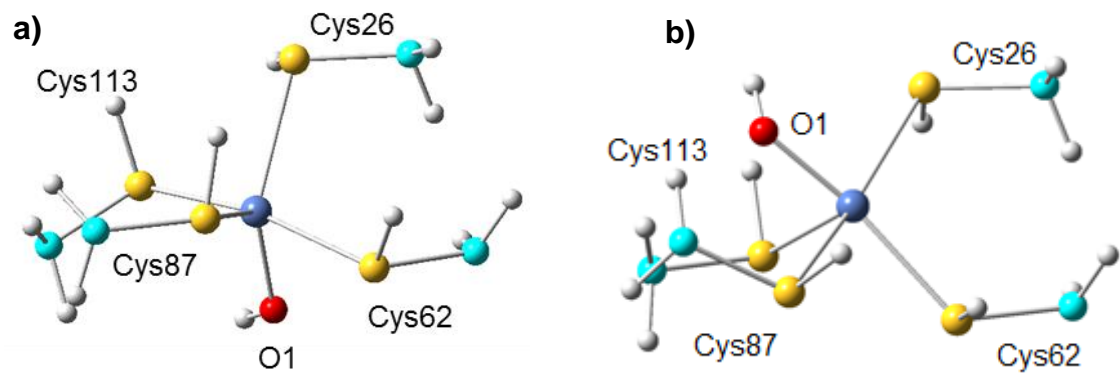

**Figure S7.** QM region of optimized I-4: a) I-4-Ni-4S-1; b) I-4-Ni-4S-2; c) I-4-Ni-3S-1; d) I-4-Ni-3S-2.
